# Supplementary material for: Manganese-induced trafficking and turnover of GPP130 is mediated by sortilin
Source: PubMed Central journal article supplement — Mol Biol Cell. 2017 Sep 15;28(19):2569–78. doi: 10.1091/mbc.E17-05-0326 (PMC5597328; doi:10.1091/mbc.e17-05-0326), 2017-09-15

# Supplemental Materials

*Molecular Biology of the Cell*

Venkat and Linstedt

**Supplemental Figure 1. Colocalization of GPP130 punctae with Rab7-GFP.** Cells were transiently transfected to express Rab7-GFP and after 48 h they were subjected to a 2h Mn exposure followed by staining with anti-GPP130 antibodies (red) and visualization of GFP fluorescence (green). Arrowheads indicate colocalization in punctae. Bar=5 $\mu$ m.

**Supplemental Figure 2. GPP130-FM redistributes to lysosomes independent of sortilin.** (A) Control and sortilin knockdown cells were transfected with GPP130-FM-GFP and, after 24 h, were subjected to AP washout for 0, 1 or 2 h before staining with anti-giantin antibodies (red) and visualization of GFP fluorescence (green). Merged and thresholded (GFP only) images are also shown. Bar=5 $\mu$ m. (B) Quantification shows the number of GPP130-FM-GFP punctae at each time point (mean $\pm$ SEM, n=3, >10 cells per experiment, n.s.=p>0.8).

**GPP130**

**Rab7-GFP**

**Merge**

**Mn (2h)**

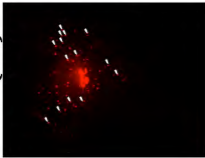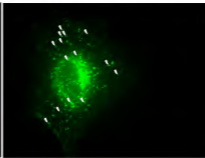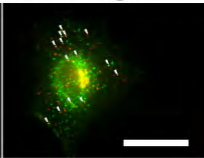

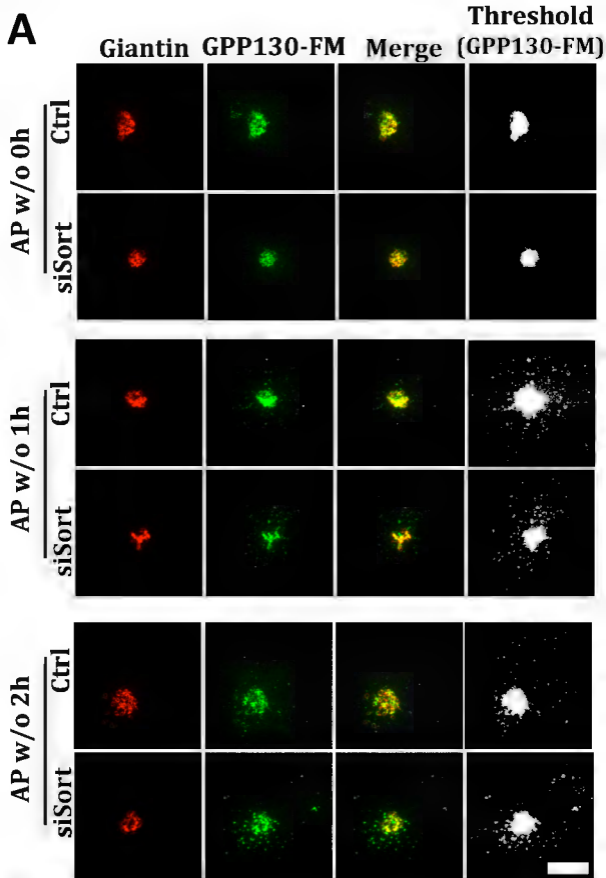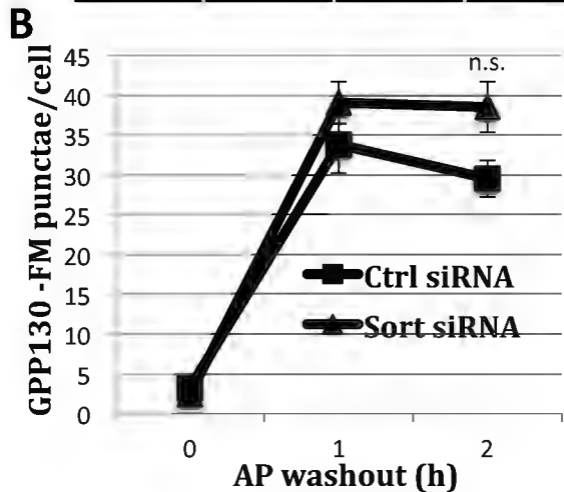

Supplement: supp_E17-05-0326v1_CombinedSupMats.pdf [file supp_E17-05-0326v1_CombinedSupMats.pdf]
